# Supplementary material
Source: PubMed Central journal article supplement (PMC4551205)
Supplement: AEM.00249-15_zam999116394so1.pdf [file AEM.00249-15_zam999116394so1.pdf]

Table S1. Descriptive analysis of the sequence data

| Gene         | Number of alleles | Fragment analyzed (bp) | Polymorphic sites | Percent of variation sites (%) | Mean G+C content (mol%) |
|--------------|-------------------|------------------------|-------------------|--------------------------------|-------------------------|
| <i>purF</i>  | 5                 | 757                    | 118               | 15.58                          | 60.42                   |
| <i>dnaJ1</i> | 4                 | 387                    | 8                 | 2.06                           | 66.07                   |
| <i>rpoB</i>  | 8                 | 860                    | 35                | 4.07                           | 64.49                   |
| <i>fusA</i>  | 6                 | 644                    | 37                | 5.74                           | 60.02                   |
| <i>ileS</i>  | 10                | 542                    | 37                | 6.82                           | 61.95                   |
| <i>clpC</i>  | 8                 | 524                    | 21                | 4.01                           | 62.58                   |
| <i>gyrB</i>  | 7                 | 402                    | 16                | 4.00                           | 62.75                   |
| <b>Total</b> | <b>48</b>         | <b>4116</b>            | <b>272</b>        | <b>7.57</b>                    | <b>62.61</b>            |

Table S2. Allelic profiles and frequencies of ST<sub>s</sub>

| ST | Allelic profile |             |             |             |             |             |             | Frequency <sup>a</sup> | %    |
|----|-----------------|-------------|-------------|-------------|-------------|-------------|-------------|------------------------|------|
|    | <i>dnaJ1</i>    | <i>clpC</i> | <i>fusA</i> | <i>gyrB</i> | <i>ileS</i> | <i>purF</i> | <i>rpoB</i> |                        |      |
| 1  | 5               | 1           | 4           | 1           | 9           | 4           | 5           | 4                      | 4.88 |
| 2  | 2               | 1           | 4           | 1           | 3           | 1           | 5           | 1                      | 1.22 |
| 3  | 5               | 3           | 1           | 2           | 3           | 7           | 1           | 5                      | 6.1  |
| 4  | 5               | 3           | 1           | 2           | 3           | 2           | 1           | 2                      | 2.44 |
| 5  | 2               | 1           | 3           | 5           | 6           | 2           | 1           | 3                      | 3.66 |
| 6  | 5               | 1           | 3           | 1           | 8           | 8           | 1           | 3                      | 3.66 |
| 7  | 1               | 1           | 1           | 1           | 8           | 8           | 1           | 1                      | 1.22 |
| 8  | 5               | 1           | 2           | 1           | 2           | 2           | 2           | 1                      | 1.22 |
| 9  | 5               | 1           | 1           | 6           | 2           | 4           | 1           | 5                      | 6.1  |
| 10 | 5               | 1           | 2           | 1           | 2           | 7           | 1           | 3                      | 3.66 |
| 11 | 5               | 1           | 5           | 2           | 6           | 3           | 1           | 1                      | 1.22 |
| 12 | 5               | 1           | 5           | 1           | 6           | 7           | 1           | 1                      | 1.22 |
| 13 | 5               | 1           | 2           | 5           | 6           | 2           | 1           | 1                      | 1.22 |
| 14 | 5               | 4           | 5           | 2           | 3           | 3           | 1           | 1                      | 1.22 |
| 15 | 2               | 1           | 2           | 1           | 4           | 7           | 6           | 3                      | 3.66 |
| 16 | 5               | 1           | 1           | 3           | 3           | 4           | 5           | 1                      | 1.22 |
| 17 | 5               | 1           | 1           | 1           | 10          | 2           | 4           | 3                      | 3.66 |

|    |   |   |   |   |    |   |   |   |       |
|----|---|---|---|---|----|---|---|---|-------|
| 18 | 5 | 1 | 1 | 1 | 9  | 4 | 4 | 1 | 1.22  |
| 19 | 5 | 1 | 1 | 3 | 10 | 4 | 5 | 1 | 1.22  |
| 20 | 5 | 1 | 1 | 3 | 9  | 4 | 7 | 1 | 1.22  |
| 21 | 5 | 1 | 1 | 1 | 10 | 2 | 1 | 1 | 1.22  |
| 22 | 5 | 1 | 1 | 2 | 5  | 2 | 1 | 8 | 9.76  |
| 23 | 5 | 3 | 1 | 2 | 5  | 2 | 1 | 2 | 2.44  |
| 24 | 5 | 1 | 1 | 3 | 5  | 4 | 5 | 1 | 1.22  |
| 25 | 5 | 1 | 3 | 5 | 2  | 4 | 1 | 9 | 10.98 |
| 26 | 5 | 1 | 6 | 5 | 2  | 4 | 1 | 2 | 2.44  |
| 27 | 5 | 1 | 3 | 5 | 2  | 4 | 4 | 1 | 1.22  |
| 28 | 5 | 1 | 8 | 4 | 7  | 6 | 3 | 2 | 2.44  |
| 29 | 5 | 1 | 3 | 5 | 7  | 4 | 1 | 1 | 1.22  |
| 30 | 3 | 2 | 8 | 4 | 7  | 6 | 3 | 3 | 3.66  |
| 31 | 1 | 1 | 1 | 1 | 1  | 1 | 1 | 5 | 6.1   |
| 32 | 1 | 1 | 1 | 1 | 1  | 5 | 1 | 1 | 1.22  |
| 33 | 4 | 1 | 1 | 6 | 1  | 1 | 1 | 1 | 1.22  |
| 34 | 5 | 1 | 7 | 5 | 2  | 4 | 1 | 2 | 2.44  |
| 35 | 5 | 1 | 1 | 5 | 2  | 4 | 1 | 1 | 1.22  |

<sup>a</sup> Frequency indicates the number of individual strains generated the same STs.
